# Supplementary material for: Assessment of the potential of drug-drug interactions among population-based oldest-old people in Turkiye
Source: PeerJ. 2025 Feb 25;13:e19032. doi: 10.7717/peerj.19032 (PMC11869883; doi:10.7717/peerj.19032)
Supplement: Supplemental Information 1 [file peerj-13-19032-s001.xlsx]

## Sheet: Form Yanıtları 1
1. Date of birth	Sex	Traffic province plate	Geographical region region	Number of medication																																										Number of potentially inappropriate mecication according to Beers	Proton pump inhibitor	H2 receptor antagonist	Nonsteroid antiinflammatory drugs NSAIDs
1936	Woman	5	6	17																																										0
1936	Woman	34	1	12																																										2	1
1936	Man	16	1	12
1936	Woman	34	1	11																																										1
1936	Woman	59	2	11																																										3
1936	Man	34	1	11
1936	Man	34	1	10																																										1
1936	Man	34	1	9																																										1
1936	Woman	34	1	8
1936	Woman	9	3	8																																										3
1936	Woman	59	2	8
1936	Woman	34	1	8																																										2
1936	Man	16	2	8																																										2			1
1936	Man	34	1	8
1936	Woman	55	6	7																																										1
1936	Woman	27	8	7																																										2
1936	Woman	9	3	7																																										1
1936	Woman	59	2	7																																										2	1
1936	Man	34	1	7																																										1			1
1936	Man	77	2	7																																										3	Lansoprazole 1
1936	Man	34	1	7																																										1
1936	Man	39	2	7																																										3	1
1936	Woman	17	2	6																																										1
1936	Woman	41	2	6																																										2
1936	Woman	16	2	6																																										1
1936	Woman	23	7	6																																										1
1936	Woman	39	2	6																																										4
1936	Woman	34	1	6
1936	Woman	34	1	6
1936	Man	34	1	6																																										1
1936	Man	16	2	6																																										1			1
1936	Man	16	2	6																																										2
1936	Man	59	2	6																																										4	1
1936	Man	34	1	6																																										1
1936	Woman	34	1	5
1936	Woman	34	1	5																																										1
1936	Woman	34	1	5
1936	Woman	34	1	5																																										2	1
1936	Woman	31	4	5																																										2
1936	Woman	34	1	5																																										2
1936	Woman	34	1	5																																										1			1
1936	Woman	34	1	5																																										1
1936	Woman	39	2	5																																										2	1
1936	Woman	59	2	5
1936	Woman	34	1	4
1936	Woman	34	1	4																																										2
1936	Woman	34	1	4
1936	Woman	34	1	4
1936	Woman	34	1	4
1936	Man	34	1	4																																										3
1936	Man	61	6	4
1936	Man	34	1	4																																										2
1936	Man	34	1	4																																										2
1936	Woman	34	1	3																																										1
1936	Woman	34	1	3																																										3			2
1936	Woman	28	6	3																																										1
1936	Woman	28	6	3
1936	Woman	34	1	3																																										2
1936	Woman	34	1	3																																										1
1936	Woman	6	5	3
1936	Woman	63	8	3
1936	Woman	34	1	3																																										1
1936	Woman	34	1	3
1936	Woman	34	1	3
1936	Woman	34	1	3
1936	Woman	34	1	3
1936	Woman	34	1	3
1936	Woman	34	1	3
1936	Woman	59	2	3																																										1
1936	Woman	59	2	3																																										2
1936	Man	34	1	3
1936	Man	34	1	3
1936	Man	34	1	3
1936	Man	41	2	3																																										2	1
1936	Man	59	2	3																																										4			1
1936	Woman	34	1	2																																										3
1936	Woman	34	1	2																																										3
1936	Woman	34	1	2																																										1		Famotidine 1
1936	Woman	29	6	2																																										2	Lansoprazole 1
1936	Woman	34	1	2
1936	Woman	34	1	2																																										3
1936	Woman	9	3	2
1936	Woman	34	1	2																																										1
1936	Woman	34	1	2
1936	Woman	34	1	2																																										1	Lansoprazole 1
1936	Man	34	1	2
1936	Man	34	1	2																																										2			1
1936	Man	34	1	2																																										2
1936	Man	34	1	2																																										1			1
1936	Man	36	7	2
1936	Man	19	6	2																																										1
1936	Man	34	1	2
1936	Man	34	1	2
1936	Man	59	2	2
1936	Woman	34	1	1																																										1
1936	Woman	34	1	1
1936	Woman	67	6	1																																										1	1
1936	Woman	34	1	1																																										1
1936	Woman	34	1	1																																										1
1936	Man	34	1	1
1936	Man	34	1	1
1936	Man	34	1	1
1936	Man	34	1	0
1935	Man	34	1	19
1935	Woman	34	1	15																																										1
1935	Woman	5	6	13																																										4	1
1935	Woman	28	6	11																																										2
1935	Woman	2	8	11
1935	Woman	34	1	10
1935	Woman	59	2	10
1935	Man	63	8	10																																										3
1935	Man	34	1	10
1935	Man	17	2	10
1935	Woman	35	3	9																																										1
1935	Man	34	1	9																																										1
1935	Man	59	2	9																																										1
1935	Woman	34	1	8																																										2
1935	Man	34	1	8																																										1
1935	Man	34	1	7																																										1
1935	Man	59	2	7																																										1
1935	Woman	34	1	6																																										2
1935	Woman	29	6	6																																										1
1935	Woman	19	6	6
1935	Man	16	2	6
1935	Woman	34	1	5
1935	Woman	34	1	5
1935	Woman	34	1	5																																										1
1935	Woman	59	2	5
1935	Woman	34	1	5																																										1
1935	Man	34	1	5
1935	Man	34	1	5																																										1
1935	Man	59	2	5
1935	Man	59	2	5
1935	Woman	34	1	4
1935	Woman	29	6	4
1935	Woman	34	1	4																																										1	lansoprazole 1
1935	Man	34	1	4																																										1
1935	Man	63	8	4																																										2	1
1935	Man	31	4	4
1935	Man	34	1	4																																										1	1
1935	Woman	34	1	3																																										1			1
1935	Woman	34	1	3
1935	Woman	34	1	3																																										3
1935	Woman	41	2	3																																										2
1935	Woman	31	4	3
1935	Woman	34	1	3
1935	Woman	34	1	3
1935	Woman	59	2	3																																										2			1
1935	Woman	59	2	3																																										1
1935	Man	44	7	3																																										2			1
1935	Man	34	1	3
1935	Man	34	1	3																																										2			1
1935	Woman	34	1	2
1935	Woman	34	1	2																																										1
1935	Woman	34	1	2																																										1			1
1935	Woman	34	1	2																																										2	lansoprazole 1		1
1935	Woman	11	2	2
1935	Woman	9	3	2
1935	Woman	34	1	2
1935	Woman	34	1	2
1935	Woman	59	2	2																																										1
1935	Man	34	1	2																																										1
1935	Man	6	5	2																																										1
1935	Man	34	1	2
1935	Man	34	1	2
1935	Man	34	1	2
1935	Woman	34	1	1
1935	Woman	34	1	1																																										2
1935	Woman	34	1	1																																										1	1
1935	Woman	9	3	1																																										4	1
1935	Man	34	1	1																																										2	1
1935	Man	34	1	1																																										1
1935	Man	34	1	1																																										1
1935	Woman	34	1	0																																										1
1934	Man	34	1	13
1934	Man	34	1	11																																										1
1934	Man	34	1	11
1934	Woman	34	1	10																																										1
1934	Woman	34	1	9
1934	Woman	54	2	8																																										1
1934	Woman	39	2	8																																										1	1
1934	Man	34	1	8																																										1
1934	Man	59	2	8
1934	Woman	34	1	7
1934	Woman	19	6	7																																										1	1
1934	Woman	19	6	7																																										3	1
1934	Woman	34	1	7																																										1
1934	Woman	59	2	7
1934	Woman	34	1	7																																										2
1934	Man	59	2	7
1934	Woman	34	1	6
1934	Woman	59	2	6
1934	Man	59	2	6
1934	Woman	34	1	5																																										2	1
1934	Woman	34	1	5																																										1
1934	Woman	31	4	5																																										1
1934	Woman	34	1	5																																										1
1934	Woman	59	2	5
1934	Man	28	6	5
1934	Man	28	6	5
1934	Woman	6	5	4
1934	Woman	34	1	4
1934	Woman	34	1	4
1934	Woman	34	1	4
1934	Woman	16	2	4																																										1
1934	Woman	31	4	4																																										2
1934	Woman	17	2	4																																										1
1934	Man	34	1	4																																										1	1
1934	Man	34	1	4
1934	Man	34	1	4																																										1	1
1934	Man	34	1	4
1934	Man	34	1	4																																										1			1
1934	Woman	31	4	3																																										1
1934	Woman	34	1	3
1934	Woman	34	1	3
1934	Woman	34	1	3
1934	Woman	34	1	3
1934	Woman	67	6	3
1934	Woman	54	2	3																																										1
1934	Woman	9	3	3
1934	Man	17	2	3																																										1
1934	Man	34	1	3																																										2
1934	Man	34	1	3
1934	Man	34	1	3																																										1
1934	Man	34	1	3
1934	Man	34	1	3
1934	Woman	34	1	2																																										2
1934	Woman	34	1	2																																										2
1934	Woman	34	1	2																																										2
1934	Woman	67	6	2																																										1
1934	Woman	9	3	2																																										2
1934	Woman	34	1	2
1934	Woman	34	1	2
1934	Woman	34	1	2
1934	Man	34	1	2																																										2
1934	Man	34	1	2																																										1
1934	Man	34	1	2																																										1
1934	Man	34	1	2																																										2			1
1934	Man	34	1	2
1934	Man	34	1	2																																										1
1934	Woman	34	1	1
1934	Woman	34	1	1																																										2
1934	Man	34	1	0																																										1			1
1934	Man	34	1	0																																										2			1
1933	Woman	34	1	13
1933	Man	7	4	13																																										1			1
1933	Man	34	1	13																																										1			1
1933	Man	39	2	9
1933	Woman	34	1	8
1933	Woman	34	1	8																																										2			1
1933	Man	34	1	8
1933	Woman	34	1	7
1933	Man	19	6	7
1933	Man	59	2	7
1933	Woman	34	1	6
1933	Woman	34	1	6																																										1
1933	Woman	34	1	6
1933	Woman	59	2	6																																										2			1
1933	Woman	59	2	6																																										1
1933	Man	35	3	6
1933	Man	34	1	6																																										3	1
1933	Man	34	1	6
1933	Man	34	1	6
1933	Woman	10	2	5																																										2			1
1933	Woman	34	1	5
1933	Woman	34	1	5																																										2			1
1933	Man	34	1	5
1933	Man	6	5	5																																										2
1933	Man	34	1	5
1933	Woman	16	2	4
1933	Woman	34	1	4
1933	Man	34	1	4
1933	Woman	34	1	3																																										1			1
1933	Woman	34	1	3																																										2			1
1933	Woman	34	1	3
1933	Woman	34	1	3
1933	Woman	34	1	3																																										1			1
1933	Woman	39	2	3																																										1
1933	Man	34	1	3																																										2			1
1933	Man	34	1	3
1933	Man	34	1	3
1933	Man	34	1	3
1933	Man	34	1	3																																										1
1933	Man	34	1	3																																										1
1933	Man	34	1	3
1933	Man	59	2	3
1933	Woman	27	8	2																																										1			1
1933	Woman	34	1	2																																										2			1
1933	Woman	34	1	2
1933	Man	34	1	2
1933	Man	34	1	2
1933	Man	34	1	2
1933	Man	34	1	2
1933	Man	34	1	2
1933	Man	59	2	2																																										2
1933	Woman	7	4	1																																										1
1933	Woman	34	1	1
1933	Woman	34	1	1
1933	Woman	34	1	1																																										1
1933	Woman	59	2	1																																										1
1933	Man	34	1	1																																										2	1
1933	Woman	34	1	0																																										2
1933	Woman	34	1	0																																										2
1933	Man	34	1	0
1932	Man	34	1	13																																										2
1932	Woman	34	1	11
1932	Woman	34	1	9
1932	Man	34	1	9																																										2			1
1932	Woman	34	1	8																																										1
1932	Woman	34	1	8																																										2	lansoprazole 1
1932	Man	34	1	8
1932	Man	59	2	8
1932	Man	59	2	8																																										1
1932	Woman	39	2	7
1932	Woman	59	2	7																																										1
1932	Man	59	2	7																																										2	1
1932	Woman	21	8	6																																										4	1
1932	Woman	34	1	6																																										4
1932	Woman	21	8	6																																										4	1
1932	Man	67	6	6																																										3	1
1932	Man	34	1	6																																										4	1
1932	Woman	34	1	5
1932	Woman	34	1	5																																										1
1932	Woman	34	1	5																																										1
1932	Woman	34	1	5																																										2			1
1932	Woman	31	4	5																																										4		famotidin 1
1932	Woman	34	1	5
1932	Woman	34	1	5																																										1
1932	Man	34		5																																										3
1932	Man	34	1	5
1932	Man	34	1	5																																										2	1		1
1932	Man	34	1	5																																										3			1
1932	Woman	28	6	4																																										3	lansoprazole 1
1932	Woman	34	1	4																																										1
1932	Woman	34	1	4																																										2
1932	Woman	17	2	4																																										3	lansoprazole 1		1
1932	Woman	34	1	4																																										1
1932	Man	29	6	4																																										1
1932	Man	34	1	4
1932	Woman	41	2	3																																										1
1932	Woman	63	8	3																																										2
1932	Woman	34	1	3
1932	Woman	34	1	3																																										1
1932	Woman	59	2	3																																										2
1932	Man	67	6	3																																										1
1932	Man	6	5	3
1932	Man	34	1	3																																										1
1932	Man	9	3	3																																										2
1932	Man	59	2	3
1932	Woman	34	1	2																																										1
1932	Woman	19	6	2
1932	Woman	34	1	2																																										1
1932	Woman	34	1	2
1932	Woman	34	1	2
1932	Woman	34	1	2
1932	Man	34	1	2																																										2
1932	Man	59	2	2
1932	Woman	34	1	1
1932	Woman	34	1	1
1932	Man	67	6	1																																										1
1932	Man	67	6	1
1932	Man	41	2	1																																										1
1932	Man	34	1	1
1932	Man	34	1	1																																										2
1932	Woman	34	1	0																																										1
1932	Woman	34	1	0																																										1
1932	Man	59	2	0																																										1
1931	Man	31	4	11
1931	Woman	34	1	9																																										2
1931	Woman	34	1	9
1931	Man	34	1	9
1931	Woman	34	1	8																																										1
1931	Man	34	1	8
1931	Woman	34	1	7																																										2
1931	Woman	34	1	7
1931	Woman	59	2	7
1931	Woman	34	1	7
1931	Woman	6	5	6																																										1
1931	Woman	27	8	6
1931	Woman	34	1	6																																										2	lansoprazole 1
1931	Woman	31	4	5																																										1
1931	Man	28	6	5																																										1
1931	Woman	34	1	4																																										1
1931	Woman	34	1	4																																										1
1931	Woman	34	1	4																																										3	1
1931	Woman	59	2	4
1931	Man	34	1	4																																										2
1931	Man	29	6	4
1931	Man	34	1	4																																										1
1931	Woman	34	1	3
1931	Woman	34	1	3
1931	Woman	29	6	3
1931	Woman	34	1	3																																										1
1931	Woman	34	1	3																																										2
1931	Woman	34	1	3																																										1
1931	Woman	34	1	3
1931	Woman	34	1	3
1931	Woman	39	2	3																																										1
1931	Woman	59	2	3																																										1
1931	Man	17	2	3																																										1
1931	Man	34	1	3																																										1
1931	Woman	34	1	2																																										4
1931	Man	34	1	2
1931	Woman	34	1	1
1931	Woman	34	1	1																																										2
1931	Woman	39	2	1
1931	Man	34	1	1																																										1
1931	Woman	34	1	0																																										1
1931	Man	34	1	0
1930	Man	34	1	11																																										1
1930	Woman	34	1	10
1930	Man	34	1	9																																										1
1930	Man	34	1	8																																										1
1930	Woman	34	1	7																																										3
1930	Man	34	1	6																																										3
1930	Man	34	1	6
1930	Man	34	1	6																																										1
1930	Woman	34	1	5
1930	Man	41	2	5																																										1
1930	Man	34	1	5																																										1	1
1930	Woman	34	1	4
1930	Woman	21	8	4																																										2
1930	Woman	34	1	4
1930	Woman	34	1	4																																										2
1930	Woman	34	1	4																																										2
1930	Man	63	8	4
1930	Man	34	1	4																																										3	1
1930	Woman	34	1	3
1930	Woman	34	1	3																																										6	lansoprazole 1		1
1930	Woman	34	1	3																																										2
1930	Woman	34	1	3																																										2
1930	Man	34	1	3
1930	Man	29	6	3																																										3	1
1930	Man	34	1	3																																										6	1		1
1930	Woman	21	8	2																																										1
1930	Woman	34	1	2
1930	Man	34	1	2																																										2		famotidine 1
1930	Man	34	1	2																																										2
1930	Man	34	1	2																																										1			1
1930	Woman	34	1	1
1930	Woman	34	1	1																																										1
1930	Woman	34	1	1																																										1			1
1930	Woman	34	1	1																																										1	1
1930	Woman	59	2	1																																										3	1
1930	Man	34	1	1																																										2	1
1930	Man	34	1	0																																										2
1929	Woman	34	1	11
1929	Woman	59	2	9																																										3
1929	Woman	34	1	8																																										3	1
1929	Woman	19	6	6																																										1	lansoprazole 1
1929	Woman	34	1	6																																										2	1
1929	Man	5	6	6																																										5	1
1929	Woman	31	4	5																																										3
1929	Woman	59	2	5																																										3
1929	Man	21	8	5																																										3
1929	Woman	34	1	4																																										3	1
1929	Woman	34	1	4																																										1
1929	Woman	21	8	4																																										4	lansoprazole1
1929	Woman	21	8	4																																										5	1
1929	Man	41	2	4																																										3		famotidine 1
1929	Man	31	4	4																																										4	1		1
1929	Woman	6	5	3																																										1
1929	Woman	28	6	3																																										1	1
1929	Woman	34	1	3																																										1	1
1929	Woman	34	1	3																																										4	1
1929	Woman	53	6	3																																										2	1		1
1929	Man	34	1	3																																										1			1
1929	Man	34	1	3																																										2	lansoprazole 1
1929	Woman	34	1	2																																										2	1		1
1929	Woman	59	2	2																																										2			1
1929	Man	34	1	2																																										3	1
1929	Man	21	8	2
1929	Man	34	1	2
1929	Woman	34	1	1																																										1	1
1928	Woman	34	1	7																																										1	1
1928	Man	59	2	6																																										2
1928	Woman	10	2	4																																										4	1		1
1928	Woman	34	1	4																																										1	1
1928	Woman	34	1	4
1928	Woman	34	1	4
1928	Man	34	1	4																																										1
1928	Man	35	3	4																																										1			1
1928	Man	21	8	4																																										1
1928	Woman	34	1	3																																										2
1928	Woman	34	1	3																																										1	1
1928	Woman	34	1	2																																										2	1		1
1928	Woman	28	6	2																																										4			1
1928	Woman	34	1	2																																										3	lansoprazole1		1
1928	Woman	34	1	2																																										1
1928	Woman	34	1	2																																										1	1
1928	Woman	34	1	0																																										2	lansoprazole1
1927	Woman	39	2	9																																										1			1
1927	Woman	34	1	6																																										1			1
1927	Man	34	1	6																																										1
1927	Woman	34	1	4																																										1			1
1927	Woman	34	1	4																																										1	1
1927	Man	31	4	4																																										1
1927	Woman	34	1	3
1927	Woman	34	1	3																																										2	1
1927	Woman	5	6	3
1927	Woman	34	1	2
1927	Woman	34	1	2
1927	Woman	34	1	2																																										3	1
1926	Woman	34	1	11																																										4	lansoprazole1		1
1926	Woman	34	1	8																																										2	1		1
1926	Man	6	5	7
1926	Woman	34	1	6																																										3	lansoprazole 1		1
1926	Woman	34	1	6																																										1	1
1926	Woman	59	2	5																																										2	1		1
1926	Woman	34	1	4																																										1	lansoprazole 1
1926	Woman	21	8	4																																										2	lansoprazole1		1
1926	Man	63	8	4																																										2	1
1926	Man	59	2	4
1926	Woman	21	8	3																																										4		Famotidine 1
1926	Man	34	1	3
1926	Woman	29	6	2																																										3			1
1926	Woman	21	8	2																																										4	1		1
1926	Woman	34	1	1																																										5			1
1926	Man	34	1	1																																										1
1926	Woman	34	1	0																																										3			1
1925	Woman	34	1	8																																										3
1925	Man	34	1	4																																										3			2
1925	Woman	21	8	3																																										4
1925	Man	21	8	3																																										2	1
1925	Woman	34	1	2																																										3
1925	Man	34	1	2																																										2
1924	Man	34	1	8																																										4	1
1924	Man	34	1	7																																										1
1924	Woman	24	7	6																																										1
1924	Woman	34	1	6																																										2	lansoprazole 1
1924	Woman	39	2	6																																										3	1
1924	Woman	21	8	5																																										4
1924	Woman	21	8	3																																										1
1924	Woman	21	8	3																																										5	1
1924	Man	21	8	1																																										2
1923	Woman	34	1	4																																										5	lansoprazole 1		1
1923	Woman	31	4	4																																										2		famotidine 1
1923	Man	34	1	4																																										3	1
1923	Woman	34	1	2																																										2	1
1923	Woman	59	2	2																																										2			1
1923	Man	58	5	1
1922	Woman	34	1	2
1922	Man	34	1	1																																										1
1921	Woman	21	8	3																																										3			1
1921	Woman	34	1	3
1921	Man	34	1	1																																										1	1
1920	Woman	34	1	2
1920	Man	34	1	2																																										4	lansoprazole 1
1919	Man	21	8	2
[truncated: 39 more columns]
