# Supplementary material for: Assessment of the potential of drug-drug interactions among population-based oldest-old people in Turkiye
Source: PeerJ. 2025 Feb 25;13:e19032. doi: 10.7717/peerj.19032 (PMC11869883; doi:10.7717/peerj.19032)
Supplement: Supplemental Information 2 [file peerj-13-19032-s002.xlsx]

## Sheet: Form Yanıtları 1
1. Date of birth	Sex	Traffic province plate	Geographical region region	Number of medication	Number of drug drug interaction	Type C: Drug-drug interaction according to Uptodate criteria	Aripirazole - venlafaxine	Diclofenac - Gingko	Amlodipine - Calcium carbonate	Desloratadine - Clopidogrel	Desloratadine - Olanzapine	Enoxaparin -Ramipril	Solifenacin - Donepezil	Paroxetine - Olanzapine , quetiapine	Quetiapine - Solifenacin	Cetirizine -Solifenacin	Cetirizine - Quetiapine	Cetirizine - Donepezil	Tamsulosin - Irbesartan	Tamsulosin , alfuzosin - Hydrochlorothiazide , indapamide	Ssalbutamol - Ppseudoephedrine	Escitalopram -Cyproheptadine	Pseudoephedrine - Doxazosin	Calcium carbonate- Hydrochlorothiazide , indapamide	Hydrochlorothiazide - Prednisolone	Tenoxicam - Methylprednisolone	Rasagline - Tamsulosin	Vitamin D3 - Hydrochlorothiazide, indapamide	Levodopa -Amlodipine	Cholecalciferol - Calcium carbonate	Warfarin - Esomeprazole , pantoprazole	Warfarin -Gliclazide	Levodopa - Carvedilol	Pramipexole - Amlodipine	Pramipexole - Entacapone	Rivaroxaban - Clarithromycin	Caffeine - Terbutaline	Bisoprolol -Carvedilol	Chlorpheniramine - Cyproheptadine	Moxifloxacin - Qquetiapine	Haloperidol - Rupatadine	Captopril - Calcium carbonate	Captopril - Magnesium carbonate	Meloxicam , diflunisal - Clopidogrel	Solifenacin , fesoterodine - Hydrochlorothiazide	Paroxetine -Hydrochlorothiazide	Moxifloxacin - Dexamethasone	Paroxetine - Metoprolol	Olanzapine - Cilazapril
1935	Woman	34	1	15	21	20
1933	Woman	34	1	13	18	15							1	1	1	1	1	1																											1	1
1935	Woman	5	6	13	17	12
1926	Woman	34	1	11	12	11																		1	1	1		1
1935	Woman	28	6	11	12	10																													1
1933	Woman	34	1	8	11	9		1
1936	Woman	5	6	17	11	6
1936	Man	16	1	12	11	10																					1
1935	Man	34	1	7	11	10
1933	Man	7	4	13	11	8
1935	Woman	35	3	9	10	7
1931	Woman	34	1	7	10	8
1934	Man	34	1	13	10	4																1	1
1933	Man	34	1	13	10	9																																									1
1930	Man	34	1	8	10	9
1932	Woman	34	1	11	9	6
1934	Man	34	1	11	9	5
1933	Man	39	2	9	9	7
1934	Woman	54	2	8	8	5
1936	Woman	39	2	6	8	8
1935	Woman	34	1	6	8	7
1934	Woman	34	1	7	8	7																						1
1936	Man	39	2	7	8	8
1935	Man	34	1	8	8	8
1930	Man	34	1	11	8	5															1															1
1930	Man	34	1	6	8	6
1929	Woman	34	1	11	7	6
1935	Woman	34	1	10	7	6
1931	Woman	6	5	6	7	5
1924	Woman	39	2	6	7	6
1933	Man	34	1	8	7	7
1936	Man	34	1	11	7	3
1936	Man	16	2	6	7	7
1935	Man	17	2	10	7	6																							1				1	1	1
1932	Man	59	2	8	7	6														1
1932	Woman	34	1	8	6	3
1931	Woman	34	1	7	6	4
1924	Woman	34	1	6	6	3
1936	Woman	41	2	6	6	5
1935	Woman	29	6	6	6	2
1935	Woman	34	1	5	6	6
1934	Woman	39	2	8	6	6								1																																1		1	1
1932	Woman	39	2	7	6	5
1931	Woman	34	1	9	6	5
1930	Woman	34	1	10	6	3																								1	1	1
1931	Man	31	4	11	6	6		1
1935	Man	63	8	10	6	4
1934	Man	34	1	11	6	6
1932	Man	34	1	9	6	6
1936	Woman	27	8	7	5	3
1936	Woman	34	1	6	5	4
1936	Woman	23	7	6	5	2
1936	Woman	34	1	11	5	4
1936	Woman	34	1	5	5	4
1936	Woman	34	1	5	5	2
1936	Woman	34	1	4	5	5	1
1934	Woman	34	1	10	5	3			1																				1
1934	Woman	34	1	5	5	4
1934	Woman	31	4	5	5	3
1930	Woman	34	1	7	5	5
1929	Woman	59	2	9	5	4
1924	Woman	24	7	6	5	5
1936	Man	16	2	8	5	4
1936	Man	34	1	8	5	5
1936	Man	34	1	7	5	4
1935	Man	34	1	19	5	3
1935	Man	34	1	9	5	5
1935	Man	59	2	7	5	4
1934	Man	34	1	8	5	3
1932	Man	67	6	6	5	5
1933	Woman	59	2	6	4	3
1936	Woman	59	2	7	4	3																																				1	1
1936	Woman	34	1	4	4	4
1935	Woman	59	2	10	4	2
1936	Woman	34	1	8	4	4
1936	Woman	34	1	12	4	3
1935	Woman	2	8	11	4	2
1935	Woman	34	1	5	4	3
1934	Woman	34	1	5	4	4
1933	Woman	34	1	8	4	3
1933	Woman	34	1	7	4	3				1	1
1932	Woman	34	1	8	4	4
1931	Woman	34	1	9	4	3
1930	Woman	21	8	4	4	1
1929	Woman	34	1	6	4	3																																						1
1926	Woman	34	1	8	4	3
1926	Woman	34	1	6	4	3
1935	Man	34	1	10	4	2
1933	Man	34	1	6	4	1
1932	Man	34	1	13	4	4													1	1								1
1932	Man	34	1	8	4	4
1933	Woman	34	1	5	3	1
1932	Woman	34	1	9	3	2						1
1932	Woman	34	1	5	3	1
1934	Woman	34	1	4	3	3
1932	Woman	34	1	5	3	3
1931	Woman	27	8	6	3	3
1936	Woman	9	3	8	3	1
1936	Woman	55	6	7	3	3
1936	Woman	16	2	6	3	2
1936	Woman	34	1	6	3	2
1936	Woman	63	8	3	3	3
1935	Woman	34	1	8	3	3
1935	Woman	34	1	4	3	2
1934	Woman	34	1	7	3	2
1934	Woman	19	6	7	3	3
1934	Woman	34	1	7	3	3
1934	Woman	59	2	5	3	2																																		1
1933	Woman	34	1	6	3	1
1932	Woman	34	1	6	3	2																						1
1931	Woman	34	1	8	3	3
1931	Woman	34	1	7	3	2
1931	Woman	34	1	6	3	3
1931	Woman	39	2	3	3	2
1929	Woman	19	6	6	3	3
1929	Woman	34	1	4	3	2
1928	Woman	34	1	4	3	3
1927	Woman	39	2	9	3	2																									1
1927	Woman	34	1	4	3	2	1
1926	Woman	34	1	0	3	1
1934	Man	34	1	4	3	1
1933	Man	59	2	7	3	3																																							1
1931	Man	34	1	4	3	2
1930	Man	34	1	9	3	2
1936	Man	34	1	10	3	1
1936	Man	61	6	4	3	3
1936	Man	34	1	3	3	3
1935	Man	59	2	9	3	2
1935	Man	34	1	4	3	2
1934	Man	59	2	7	3	2
1934	Man	34	1	4	3	3
1933	Man	19	6	7	3	3														1
1933	Man	34	1	5	3	3
1933	Man	34	1	5	3	2
1932	Man	59	2	8	3
1932	Man	34		5	3	2
1931	Man	34	1	8	3	1
1929	Man	21	8	5	3	1
1936	Woman	34	1	3	2	2
1932	Woman	34	1	5	2	1
1936	Woman	59	2	8	2	1																																	1
1936	Woman	34	1	8	2	2																		1
1936	Woman	9	3	7	2	2
1936	Woman	17	2	6	2
1936	Woman	34	1	5	2	2
1936	Woman	39	2	5	2	2
1936	Woman	34	1	4	2	2
1936	Woman	34	1	3	2	1
1935	Woman	34	1	5	2	2
1935	Woman	34	1	5	2	1
1934	Woman	19	6	7	2	2
1934	Woman	34	1	6	2	2
1934	Woman	34	1	3	2	2
1933	Woman	10	2	5	2
1933	Woman	16	2	4	2	1
1932	Woman	34	1	4	2	1
1932	Woman	17	2	4	2	2
1932	Woman	34	1	3	2
1931	Woman	59	2	7	2	1
1930	Woman	34	1	5	2	2																						1
1929	Woman	31	4	5	2	2																		1
1929	Woman	21	8	4	2	2
1929	Woman	6	5	3	2	1
1928	Woman	10	2	4	2	2
1925	Woman	34	1	8	2
1935	Man	59	2	5	2	2																																						1
1934	Man	34	1	4	2	2
1932	Man	34	1	6	2	1
1936	Man	34	1	9	2	1
1936	Man	77	2	7	2	2
1936	Man	34	1	4	2	2
1936	Man	34	1	3	2	1
1935	Man	59	2	5	2	1
1934	Man	59	2	6	2	1																															1
1933	Man	35	3	6	2	2
1933	Man	34	1	6	2	1
1933	Man	34	1	6	2	1
1933	Man	6	5	5	2	2
1933	Man	34	1	3	2	2
1931	Man	34	1	9	2
1931	Man	17	2	3	2	2
1930	Man	34	1	6	2	1
1928	Man	59	2	6	2	1																																			1
1926	Man	6	5	7	2	1
1924	Man	34	1	8	2	2
1934	Woman	17	2	4	1	1
1933	Woman	59	2	6	1	1
1929	Woman	59	2	2	1	1
1936	Woman	28	6	3	1	1
1935	Woman	34	1	3	1	1
1934	Woman	34	1	3	1	1
1928	Woman	34	1	3	1	1
1936	Woman	59	2	11	1	1
1936	Woman	34	1	5	1	1
1936	Woman	34	1	5	1	1
1936	Woman	31	4	5	1	1
1936	Woman	34	1	3	1	1
1936	Woman	34	1	3	1	1
1936	Woman	34	1	2	1
1935	Woman	19	6	6	1	1
1935	Woman	34	1	4	1	1
1935	Woman	34	1	3	1
1935	Woman	34	1	3	1	1
1935	Woman	41	2	3	1
1935	Woman	31	4	3	1
1935	Woman	34	1	2	1	1
1935	Woman	34	1	2	1
1935	Woman	11	2	2	1	1
1935	Woman	9	3	2	1
1935	Woman	34	1	2	1	1
1934	Woman	34	1	9	1
1934	Woman	59	2	7	1
1934	Woman	16	2	4	1	1
1934	Woman	31	4	3	1	1
1934	Woman	34	1	3	1	1
1934	Woman	34	1	2	1
1934	Woman	34	1	2	1	1
1933	Woman	34	1	6	1
1933	Woman	34	1	4	1	1
1933	Woman	34	1	3	1	1
1933	Woman	34	1	3	1
1933	Woman	39	2	3	1	1
1932	Woman	21	8	6	1	1
1932	Woman	21	8	6	1	1
1932	Woman	34	1	5	1	1
1932	Woman	34	1	5	1	1
1932	Woman	31	4	5	1
1932	Woman	34	1	4	1	1
1932	Woman	63	8	3	1	1
1932	Woman	59	2	3	1
1932	Woman	34	1	2	1
1931	Woman	31	4	5	1	1
1931	Woman	34	1	4	1	1
1931	Woman	34	1	3	1
1931	Woman	34	1	3	1
1931	Woman	29	6	3	1	1
1931	Woman	34	1	3	1	1
1931	Woman	34	1	3	1	1
1931	Woman	34	1	2	1	1
1931	Woman	39	2	1	1
1930	Woman	34	1	4	1	1
1930	Woman	34	1	4	1	1
1930	Woman	34	1	4	1	1
1930	Woman	34	1	2	1
1929	Woman	59	2	5	1
1929	Woman	34	1	3	1
1929	Woman	53	6	3	1
1928	Woman	34	1	4	1	1
1928	Woman	34	1	2	1	1
1927	Woman	34	1	6	1	1
1927	Woman	34	1	4	1	1
1927	Woman	34	1	3	1	1
1926	Woman	34	1	6	1	1
1926	Woman	59	2	5	1	1																																1
1925	Woman	21	8	3	1	1
1924	Woman	21	8	3	1	1
1923	Woman	34	1	4	1	1
1921	Woman	21	8	3	1	1
1936	Man	41	2	3	1	1
1935	Man	34	1	5	1	1
1934	Man	34	1	2	1	1
1931	Man	34	1	4	1	1
1923	Man	34	1	4	1	1
1936	Man	34	1	6	1	1
1936	Man	16	2	6	1
1936	Man	59	2	6	1
1936	Man	34	1	2	1	1
1935	Man	16	2	6	1	1
1935	Man	63	8	4	1	1
1935	Man	34	1	4	1	1
1935	Man	34	1	3	1	1
1934	Man	59	2	8	1	1
1934	Man	28	6	5	1
1934	Man	17	2	3	1	1
1934	Man	34	1	3	1	1
1934	Man	34	1	3	1
1934	Man	34	1	2	1
1933	Man	34	1	3	1	1
1933	Man	34	1	3	1	1
1933	Man	34	1	3	1	1
1933	Man	34	1	3	1	1
1933	Man	34	1	3	1	1
1933	Man	59	2	3	1	1																																							1
1933	Man	34	1	2	1	1
1933	Man	34	1	2	1	1
1932	Man	29	6	4	1	1
1931	Man	29	6	4	1
1931	Man	34	1	3	1	1
1930	Man	41	2	5	1	1
1930	Man	34	1	5	1	1
1930	Man	34	1	4	1	1
1930	Man	34	1	2	1	1
1929	Man	5	6	6	1
1929	Man	34	1	2	1	1
1927	Man	34	1	6	1	1
1927	Man	31	4	4	1	1
1926	Man	63	8	4	1
1925	Man	34	1	4	1
1924	Man	34	1	7	1	1
1936	Woman	34	1	5	0
1936	Woman	34	1	5	0
1936	Woman	59	2	5	0
1936	Woman	34	1	4	0
1936	Woman	34	1	4	0
1936	Woman	28	6	3	0
1936	Woman	34	1	3	0
1936	Woman	6	5	3	0
1936	Woman	34	1	3	0
1936	Woman	34	1	3	0
1936	Woman	34	1	3	0
1936	Woman	34	1	3	0
1936	Woman	34	1	3	0
1936	Woman	34	1	3	0
1936	Woman	59	2	3	0
1936	Woman	59	2	3	0
1936	Woman	34	1	2	0
1936	Woman	34	1	2	0
1936	Woman	34	1	2	0
1936	Woman	29	6	2	0
1936	Woman	34	1	2	0
1936	Woman	9	3	2	0
1936	Woman	34	1	2	0
1936	Woman	34	1	2	0
1936	Woman	34	1	2	0
1936	Woman	34	1	1	0
1936	Woman	34	1	1	0
1936	Woman	67	6	1	0
1936	Woman	34	1	1	0
1936	Woman	34	1	1	0
1935	Woman	59	2	5	0
1935	Woman	29	6	4	0
1935	Woman	34	1	3	0
1935	Woman	34	1	3	0
1935	Woman	59	2	3	0
1935	Woman	59	2	3	0
1935	Woman	34	1	2	0
1935	Woman	34	1	2	0
1935	Woman	34	1	2	0
1935	Woman	59	2	2	0
1935	Woman	34	1	1	0
1935	Woman	34	1	1	0
1935	Woman	34	1	1	0
1935	Woman	9	3	1	0
1935	Woman	34	1	0	0
1934	Woman	59	2	6	0
1934	Woman	34	1	5	0
1934	Woman	6	5	4	0
1934	Woman	34	1	4	0
1934	Woman	34	1	4	0
1934	Woman	31	4	4	0
1934	Woman	34	1	3	0
1934	Woman	67	6	3	0
1934	Woman	54	2	3	0
1934	Woman	9	3	3	0
1934	Woman	34	1	2	0
1934	Woman	34	1	2	0
1934	Woman	67	6	2	0
1934	Woman	9	3	2	0
1934	Woman	34	1	2	0
1934	Woman	34	1	2	0
1934	Woman	34	1	1	0
1934	Woman	34	1	1	0
1933	Woman	34	1	6	0
1933	Woman	34	1	5	0
1933	Woman	34	1	3	0
1933	Woman	34	1	3	0
1933	Woman	34	1	3	0
1933	Woman	27	8	2	0
1933	Woman	34	1	2	0
1933	Woman	34	1	2	0
1933	Woman	7	4	1	0
1933	Woman	34	1	1	0
1933	Woman	34	1	1	0
1933	Woman	34	1	1	0
1933	Woman	59	2	1	0
1933	Woman	34	1	0	0
1933	Woman	34	1	0	0
1932	Woman	59	2	7	0
1932	Woman	34	1	5	0
1932	Woman	28	6	4	0
1932	Woman	34	1	4	0
1932	Woman	41	2	3	0
1932	Woman	34	1	3	0
1932	Woman	19	6	2	0
1932	Woman	34	1	2	0
1932	Woman	34	1	2	0
1932	Woman	34	1	2	0
1932	Woman	34	1	2	0
1932	Woman	34	1	1	0
1932	Woman	34	1	1	0
1932	Woman	34	1	0	0
1932	Woman	34	1	0	0	0
1931	Woman	34	1	4	0
1931	Woman	34	1	4	0
1931	Woman	59	2	4	0
1931	Woman	34	1	3	0
1931	Woman	34	1	3	0
1931	Woman	34	1	3	0
1931	Woman	59	2	3	0
1931	Woman	34	1	1	0
1931	Woman	34	1	1	0
1931	Woman	34	1	0	0
1930	Woman	34	1	4	0
1930	Woman	34	1	3	0
1930	Woman	34	1	3	0
1930	Woman	34	1	3	0
1930	Woman	34	1	3	0
1930	Woman	21	8	2	0
1930	Woman	34	1	1	0
1930	Woman	34	1	1	0
1930	Woman	34	1	1	0
1930	Woman	34	1	1	0
1930	Woman	59	2	1	0
1929	Woman	34	1	8	0
1929	Woman	34	1	4	0
1929	Woman	21	8	4	0
1929	Woman	28	6	3	0
1929	Woman	34	1	3	0
1929	Woman	34	1	2	0
1929	Woman	34	1	1	0
1928	Woman	34	1	7	0
1928	Woman	34	1	4	0
1928	Woman	34	1	3	0
1928	Woman	34	1	2	0
1928	Woman	28	6	2	0
1928	Woman	34	1	2	0
1928	Woman	34	1	2	0
1928	Woman	34	1	0	0
1927	Woman	34	1	3	0
1927	Woman	5	6	3	0
1927	Woman	34	1	2	0
1927	Woman	34	1	2	0
1927	Woman	34	1	2	0
1926	Woman	34	1	4	0
1926	Woman	21	8	4	0
1926	Woman	21	8	3	0
1926	Woman	29	6	2	0
1926	Woman	21	8	2	0
1926	Woman	34	1	1	0
1925	Woman	34	1	2	0
1924	Woman	21	8	5	0
1924	Woman	21	8	3	0
1923	Woman	31	4	4	0
1923	Woman	34	1	2	0
1923	Woman	59	2	2	0
1922	Woman	34	1	2	0
1921	Woman	34	1	3	0
1920	Woman	34	1	2	0
1936	Man	34	1	7	0
1936	Man	34	1	6	0
1936	Man	34	1	4	0
1936	Man	34	1	4	0
1936	Man	34	1	3	0
1936	Man	59	2	3	0
1936	Man	34	1	2	0
1936	Man	34	1	2	0
1936	Man	34	1	2	0
1936	Man	36	7	2	0
1936	Man	19	6	2	0
1936	Man	34	1	2	0
1936	Man	34	1	2	0
1936	Man	59	2	2	0
1936	Man	34	1	1	0
1936	Man	34	1	1	0
1936	Man	34	1	1	0
1936	Man	34	1	0	0
1935	Man	34	1	5	0
1935	Man	31	4	4	0
1935	Man	44	7	3	0
1935	Man	34	1	3	0
1935	Man	34	1	2	0
1935	Man	6	5	2	0
1935	Man	34	1	2	0
1935	Man	34	1	2	0
1935	Man	34	1	2	0
1935	Man	34	1	1	0
1935	Man	34	1	1	0
1935	Man	34	1	1	0
1934	Man	28	6	5	0
1934	Man	34	1	4	0
1934	Man	34	1	4	0
1934	Man	34	1	3	0
1934	Man	34	1	3	0
1934	Man	34	1	3	0
1934	Man	34	1	2	0
1934	Man	34	1	2	0
1934	Man	34	1	2	0
1934	Man	34	1	2	0
1934	Man	34	1	0	0
1934	Man	34	1	0	0
1933	Man	34	1	4	0
1933	Man	34	1	3	0
1933	Man	34	1	2	0
1933	Man	34	1	2	0
1933	Man	34	1	2	0
1933	Man	59	2	2	0
1933	Man	34	1	1	0
1933	Man	34	1	0	0
1932	Man	59	2	7	0
1932	Man	34	1	5	0
1932	Man	34	1	5	0
1932	Man	34	1	5	0
1932	Man	34	1	4	0
1932	Man	67	6	3	0
1932	Man	6	5	3	0
1932	Man	34	1	3	0
1932	Man	9	3	3	0
1932	Man	59	2	3	0
1932	Man	34	1	2	0
1932	Man	59	2	2	0
1932	Man	67	6	1	0
1932	Man	67	6	1	0
1932	Man	41	2	1	0
1932	Man	34	1	1	0
1932	Man	34	1	1	0
1932	Man	59	2	0	0
1931	Man	28	6	5	0
1931	Man	34	1	2	0
1931	Man	34	1	1	0
1931	Man	34	1	0	0
1930	Man	34	1	6	0
1930	Man	63	8	4	0
1930	Man	34	1	3	0
1930	Man	29	6	3	0
1930	Man	34	1	3	0
1930	Man	34	1	2	0
1930	Man	34	1	2	0
1930	Man	34	1	1	0
1930	Man	34	1	0	0
1929	Man	41	2	4	0
1929	Man	31	4	4	0
1929	Man	34	1	3	0
1929	Man	34	1	3	0
1929	Man	21	8	2	0
1929	Man	34	1	2	0
1928	Man	34	1	4	0
1928	Man	35	3	4	0
1928	Man	21	8	4	0
1926	Man	59	2	4	0
1926	Man	34	1	3	0
1926	Man	34	1	1	0
1925	Man	21	8	3	0
1925	Man	34	1	2	0
1924	Man	21	8	1	0
1923	Man	58	5	1	0
1922	Man	34	1	1	0
1921	Man	34	1	1	0
1920	Man	34	1	2	0
1919	Man	21	8	2	0
[truncated: 386 more columns]
